# Supplementary material for: Sizing ice hydrometeor populations using dual-wavelength radar ratio
Source: Copernicus journal article supplement (doi:10.5194/amt-2022-174), 2022-06-07

Scale:  $-10 < Z < 44$  dBZ

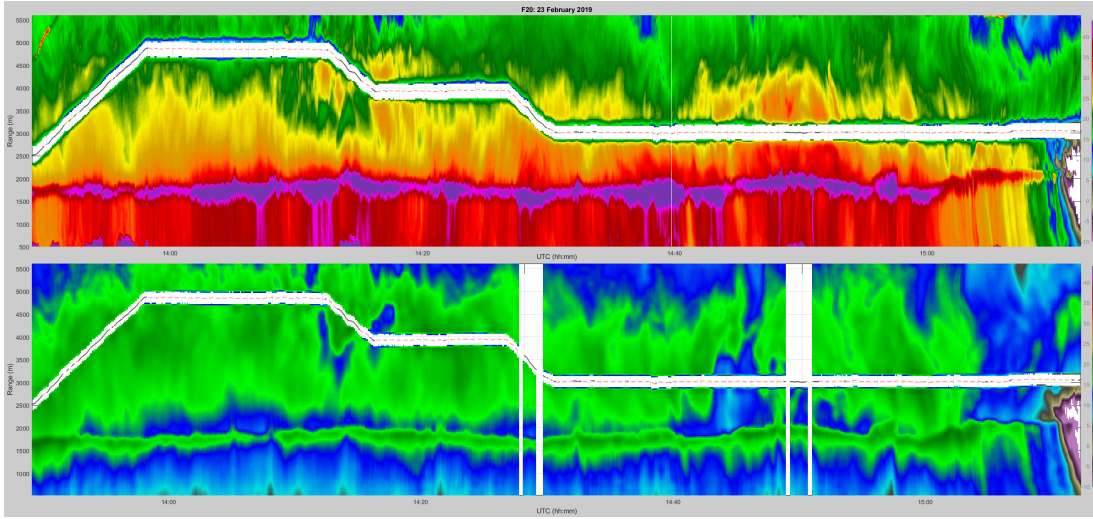

Scale:  $-5 < Z < 44$  dBZ

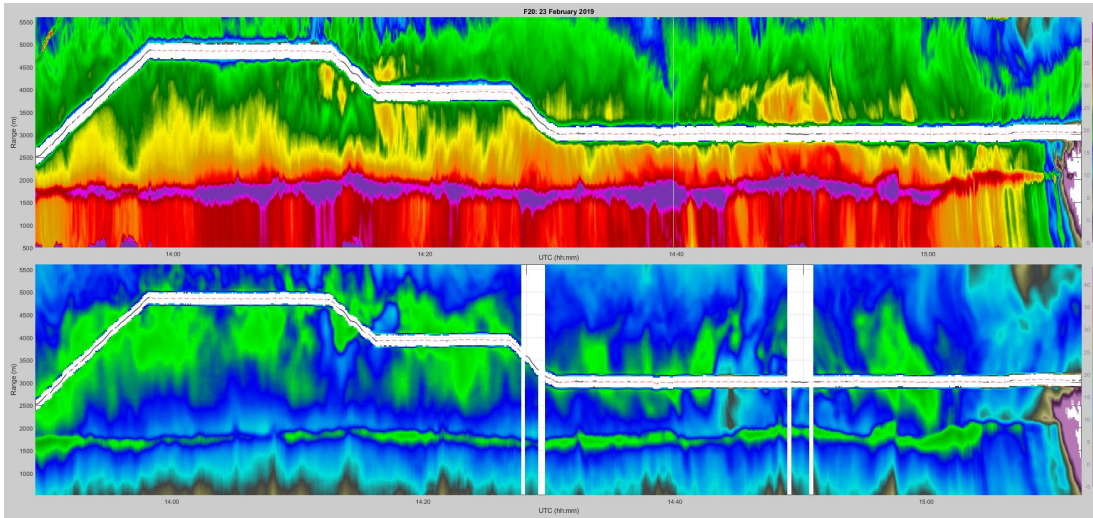

Scale:  $-20 < Z < 44$  dBZ

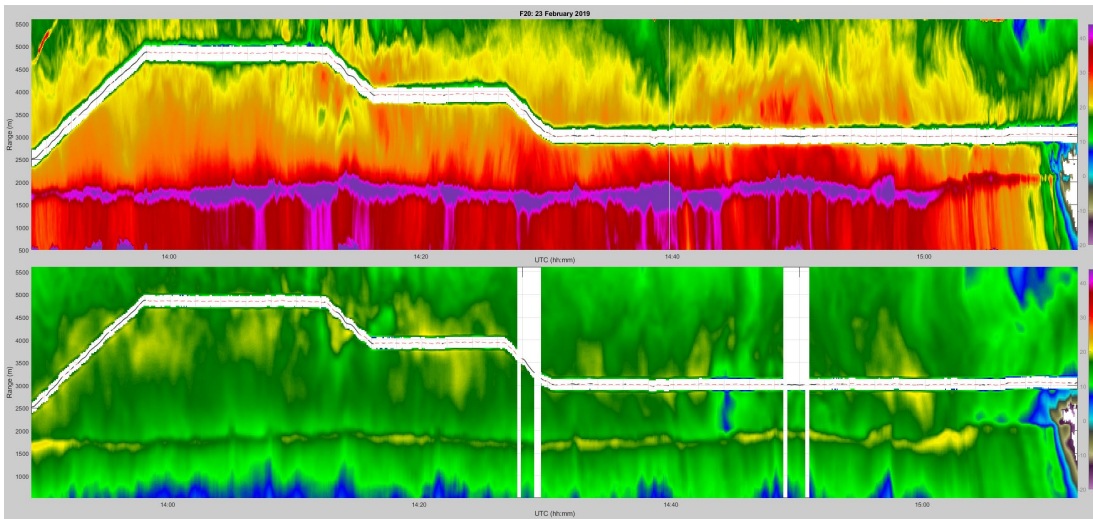

Supplement: Supplementary file [file amt-2022-174-AC2-supplement.pdf]
